# Supplementary material
Source: PubMed Central journal article supplement (PMC113142)
Supplement: nar_28_21_4237__1.pdf [file nar_28_21_4237__1.pdf]

## SUPPLEMENTARY MATERIAL

### Appendix S1

List of the complete sequences mapped by the replication blockage assay.

*pSV010 forward primer:*

ATAATGGTTACAAATAAAGCAATAGCATCACAAAT-  
TTCACAAATAAAGCATTTTTTTTCACTGCATTCTAGTT-  
GTGGTTTTGTCCAAACTCATCAATGTAT

*pSV010 reverse primer:*

CCAACACTCTGAACACAGCAGTGAGGACTCCAGAT-  
ATTTAATTACCCTTAGAAGCGGTCTGTGAAAAACCC-  
CTACCCAATTTCTTTTTTGTAAAGTGACCTATTAACA-  
GGAGGACACAGAGGGTGGATGGGCAGCCTACGATT-  
GGAATGTCCTCTCAAGTAGAGGAGGTTAGGGTTTAT-  
GAGGACACAGAGGAGCTTCTGGGGATC

*pSV011 reverse primer (SV40 origin region):*

AGGTTCCAGTACGACTGTGAACGACGGCCAGTGC-  
CAAGCTTGCAAAGCCTAGGCCTCCAAAAAGCCTCCT-  
CACTACTTCTGGAATAGCTCAACGGAGGCGCCTCGG-  
CCTCTGCATAAATAAAAAAATTAGTCAGCCATGG-  
GGCGGAGATGGGCGGAACTGGGCGGAGTTAGGGGC-  
GGGATGGGCGGAGTTAGGGGCGGGACTATGGTTGC-  
TGACTAATTGAGATGCATGCCTGCAGGTGCACTCTA-  
GAGGATCC

*pSV011 SV40 primer:*

GACAGGTTCCGACTGGAAGCGGGCAGTGAGCAGCA-  
CAACGCAATTAATGTGAGTTAGCTCACTCATTAGGC-  
AACCCAGGCTTTACACTTTATGCTTCCGGCTCGTA-  
TGTTGTGTGAATTGTGAGCGGATAACAATTTTACA-  
CAGGAACAGCTATGACATGATTACGAATTCGAGC-  
TCGGTACCCGGGATCCTCTAGGGTTCGACCTGCAGG-  
CATGCATCTCAATTAGTCAGCAACCATAGTCCCGCC-  
CCTAACTCCGC

*pSV010 SV40 primer:*

TTAGGTACCTTCTGAGGCGGAAAGAACCAGCTGTG-  
GATGTGTGTGAGTTAGGGTGTGGAAAGTCCCCAGG-  
CTCCCCAGCAGGCAGAGTATGCAAAGCATGCATCT-  
CAATTAGTCAGCAACCAGGTGTGGAAAGTCCCCAG-  
GCT-CCCCAGCAGGCAGAGTATGCAAAGATGCATCT-  
CAATTAGTC

*pSVCAT CAT primer:*

CGGCTTAAGCGTTATACCAGCTGAACGGTCTGGTTT-  
AAGGTTACATTGAGCAACTTGACTGAAATGCCTCAA-  
ATGTTCTTTACGATGCCATTGGATATATCAACGGTG-  
GATATCCAGTGAATTTTTTCTCCATTTTAGCTTCCTT-  
AGTCTCTGAAAATCTCGCCAAGCTCCCGGAGCTTT-  
TTGCAAAAGCCTAGGCCTCCAAAAAGCCTCCTCAC-  
TACTTCTGGAATAGCCTTCCAAGACGGGAGGCGGC-  
CTCGGCTCTGTAAAT

*pSV011 CAT primer:*

CGATAATTGTGGAACGCAGGTTTCCATGCACGACTT-  
GTGAAAACGACGGCCATGGCCAAGC

*pSV010 CAT primer:*

TCAGAGGAATATTCGTACCAGGCACTCCTTCAAGAC-  
CTAGAAGGTCCATTAGCTG?AAAGATTCTCTCTGT-  
TAAAAGCTTTATCCGATCTTTGCAAAG

*M13mp18 reverse primer:*

GAAGAACCAGCAAGCGCCATTCGCCATTCAGGCTG-  
CGCAACTGTTGGAAGGGCGATCGGTGCGGGCTCTT-  
CGCTATTAGCCCAGCTGGCGAAAGGGGGATGTGCT-  
GCAAGGCGATTAAGTTGGGTAACGCCAGGGTTTTCC-  
CAGTCACGACGTTGTAACGACGGCCAGTGCCAA-  
GCTTGCATGCCTGCAGGTGCACTCTAGAGGAT

*M13insert1 reverse primer:*

AACTCTAGAGGTTATGGAAGAGCAGGACTGTAACA-  
ATGGCAGATCCACAGACGGGTGTGGTCGCCATGAT-  
CGGTAGTCGATAGTGGCTCCAAGTAGCGAAGCGAG-  
CAGGACTGGGCGGCGGCCAAAGCGGTGCGACAGTG-  
CTCCGAGACGGGTGCGATAGAAATTGCATCAAGAT-  
ATAGCG

*M13insert3 reverse primer:*

AAAGACTTTTTCTACTACAGGCCTCCCGTAGTCGCCC-  
TGTAAGTAACCATTTTTAAAAATGAGCATATATATTCC-  
ATTGGCGCCTGTACCGATCGCCCCAAATACCAACCA-  
TCATAACAATAGTTTCGCTGGAATTCGAGCTCGGTAC-  
CCGGGGATCCTCTAGAGTCCG

*M13insert4 reverse primer:*

TGGAGGAGGCAGAGAATGAACTTTTTCATTTTCCAAG-  
TCATCGAACTTCAAATGCGAGGTAATTCGAGTCGTT-  
TATTAGCTTTTCATCGATTGTCTGGATATGTCTTGGT-  
ATTTT

*M13insert5 reverse primer:*

TTTGA AAAAATACTAATTCTGAGAAGGCGACATCC-  
AAGCAAAGAACGATGAAACCTATCTGTTTCTTCAGG-  
ATCAGGATGAAAGCGCTGATTTCGCATCACCATGAC-  
GAGTTAGGTTTCAGAAATCACTTTGGCTGACAATAA-  
GTTTTCTTATTTGCCCCCAACTCTAGAAGAGTTGAT-  
GGAAGAGCAGGACTGTAACAATGGCAGATC

*M13mp18 forward primer:*

TCATAATGCAGCTGGCACGACAGGTTTCCCGACTGG-  
AAAGCGGGCAGTGAGCGCAACGCAATTAATGTGAC-  
GTTAGCTCACTCATTAGGCACCCAGGCTTTACACT-  
TTATGCTTCCGGCTCGTATGTTGTGTGGAATTGTGA-  
GCGGATAACAATTTACACAGGAAACAGCTATGAC-  
CATGATTACGAATTCGAGCTCGGTACCCGGGGATCC-  
TCTAGAGTCGACCTGCAGGCATGCA

*M13insert1 forward primer:*

TGAAATGGAGGAGGCAGAAGAATGAACTTTTTCAT-  
TTTCAAGTCATCGAACTTCAAAAATGCGAGGTAATT-  
CGAGTCGTTTATTAGCTTTTATCGATTGTCTGGATAT-  
GTCTTGGTATTTTCTCTTTTCTTTGGAA

*M13insert4 forward primer:*

TTCATCACGTGCTTTGAAAAAATACTAATTCTGA-  
GAAGCGCAACATCCAAGCAAAGAACGATGAAACCT-  
AATCTGTTTCTCAGGATCAGGATGAAAGCGCTGATT-  
CGCATCACCATGACGAGTTAGGTTTCAGAAATCACTT-  
TGGCTGACAATAAGTTTTTCTTATTTGCCCCCAACTCT-  
AGAGGATCCCCGGGTACCGAGCTC

*M13insert5 forward primer:*

TCTTGGGGCAAACCCAATGTTTTGAAGTTCTAACCC-  
ACCAAGCTAGACTTCTTCTTCTTTTTACTGCCATCGT-  
TTTCGAATTCAGCGAACTATTGTTATGATGGTTGG-  
TATTTGGGGCGATCGGTACAGGCGCCAATGGATATT-  
ATTATGCTCATTTTTAAAAATGGTTACTACGAGGGCG-  
ACTAGCGGAGGGGGGATCCTCTAGAGTCGACCTGC-  
AGGCATGCAAG

## Appendix S2

Tabulation of stop sites found in the replication blockage assay.

*pSV010 forward primer:*

TGGT AAGC TAGT TGGT

*pSV010 reverse primer:*

AGGA CGGT AGGA AGGA AGGGT TGA TGGC  
TGA AGGA AGGT AGGGT AGGA AGGA TGGGA

*pSV011 reverse primer:*

CGGC TGA TGGGC CGGA TGGC CGGA TGGC  
CGGA AGGGC CGGA TGGC CGGA AGGGC  
CGGA TGGT GAG AGGT AGGA

*pSV011 SV40 primer:*

AGGT TGA CGGC AGC AGC CGC TGA CGGA  
AGGA CGGT CGGGA AGGGT AGC

*pSV010 SV40 primer:*

AGGT AGC CGGA TGA AGGGT TGA AGC AGC  
CAG GAGT AAGC TAGT AGGT TGA AAGT AGC  
AGC

*pSVCAT CAT primer:*

CGGT TGGT AGGT GAGC CGGA AGC AAGC TGA  
AAG AGC CGC CGC

*pSV011 CAT primer:*

CGAT TGA AGGT

*pSV010 CAT primer:*

AGGA AGC AAG TAGA AGGT AAG

*RFM13mp18 reverse primer:*

CAGC AGC TGA AGGC CGT CGGC AGGGGA  
AGC TGGT AGGT CGC AGT AGGA

*M13insert1 reverse primer:*

TGA AGGA TGC CAG CGGT TGT TGC AGGA  
TGGC CGC CGC CGT CGGA CGGT

*M13insert3 reverse primer:*

AGC TGC TGA CGT CGGGA

*M13 insert4 reverse primer:*

TGA AGGA AGT

*M13insert5 reverse primer:*

AGC AGGA AGA AGT TGA AGA TGC

*M13mp18 RF forward primer:*

TGC AGT TGA CGGC AGC AGC CGC TGA  
CGA AGA CGGGA AGC

*M13insert1 forward primer:*

TGA AGA AGC AGT TGA TGT TGA

*M13insert4 forward primer:*

AGC AGA AGA AGT TGC AGA CGGT

*M13insert5 forward primer:*

TGGGC TGT TGGGC CGT AGC AGC TGA  
TGT AGGC CGA AGGGGA AGC

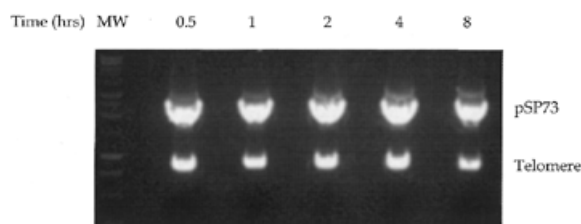

**Figure S1.** Time-course platination of pSP73.Sty11. Image of a 1% agarose dye gel, under UV irradiation, containing five time points showing the 800 bp telomere fragment and the 2464 bp pSP73 fragment. The faint lane on the far left (MW) is a molecular weight marker.
